# Supplementary material for: Cold-induced urticarial autoinflammatory syndrome related to factor XII activation
Source: Nat Commun. 2020 Jan 10;11:179. doi: 10.1038/s41467-019-13984-8 (PMC6954242; doi:10.1038/s41467-019-13984-8)
Supplement: Supplementary file 1 — Supplementary Information [file 41467_2019_13984_MOESM1_ESM.pdf]

**Cold-induced urticarial autoinflammatory syndrome related to factor XII activation**  
**Scheffel et al.**

**Supplementary Information**

**Table of Contents:**

**Supplementary Table 1**

**Supplementary Figures 1-4**

**Supplementary Table 1**

**Characteristics, triggers and clinical phenotype of different cold-induced urticarial disorders**

|                                                            | <b>FACAS</b>                                                             | <b>CAPS</b>                                                                                                                                                    | <b>FCAS 2</b>                                                            | <b>FCAS 3</b>                                                                                                                                                 | <b>PLAID</b>                                                                                                | <b>Acquired cold urticaria</b>                                               |
|------------------------------------------------------------|--------------------------------------------------------------------------|----------------------------------------------------------------------------------------------------------------------------------------------------------------|--------------------------------------------------------------------------|---------------------------------------------------------------------------------------------------------------------------------------------------------------|-------------------------------------------------------------------------------------------------------------|------------------------------------------------------------------------------|
| <b>Gene</b>                                                | <i>F12</i>                                                               | <i>NLRP3</i>                                                                                                                                                   | <i>NLRP12</i>                                                            | <i>NLR4</i>                                                                                                                                                   | <i>PLCG2</i>                                                                                                | -                                                                            |
| <b>Disease triggers</b>                                    | Generalized exposure to cold (humid) air                                 | Generalized exposure to cold (humid) air;<br><br>Stress, infections                                                                                            | Generalized exposure to cold (humid) air;<br><br>Stress, infections      | Generalized exposure to cold (humid) air;<br><br>Stress, infections                                                                                           | Generalized exposure to cold air;<br>Evaporative cooling of skin;<br>Cold water immersion                   | Direct skin contact with cold air, liquids or solids                         |
| <b>Cold contact provocation tests (Ice cube/TempTest®)</b> | Negative                                                                 | Negative                                                                                                                                                       | Negative                                                                 | Negative                                                                                                                                                      | Negative                                                                                                    | Positive                                                                     |
| <b>Characteristics of skin lesions</b>                     | Generalized wheals or erythematous papules/plaques resolving after hours | Generalized wheals or erythematous papules/plaques resolving after hours                                                                                       | Generalized wheals or erythematous papules/plaques resolving after hours | Generalized wheals or erythematous papules/plaques resolving after hours                                                                                      | Localized wheals resolving after minutes - hours;<br><br>Chronic granulomatous skin lesions in few patients | Localized wheals/angioedema at sites of cold contact resolving after minutes |
| <b>Skin sensations</b>                                     | Pruritus, burning and pain                                               | No or only mild pruritus, burning or pain                                                                                                                      | No or only mild pruritus, burning or pain                                | No or only mild pruritus, burning or pain                                                                                                                     | Pruritus                                                                                                    | Pruritus                                                                     |
| <b>Systemic/associated disease</b>                         | Musculoskeletal involvement, chills/fever, headache, fatigue             | Musculoskeletal involvement, chills/fever, headache, fatigue;<br><br>Uveitis; Sensorineural hearing loss and aseptic meningitis in severe phenotypes MWS/NOMID | Musculoskeletal involvement, chills/fever, headache, fatigue             | Musculoskeletal involvement, chills/fever, headache, fatigue;<br><br>Gastrointestinal involvement;<br><br>Macrophage activation syndrome in severe phenotypes | Autoimmune disease;<br><br>Immunodeficiency;<br><br>Type I allergies                                        | None                                                                         |
| <b>Disease onset and course</b>                            | After birth/infancy;<br><br>Lifelong                                     | After birth/infancy, rarely late-onset adulthood;<br><br>Lifelong                                                                                              | After birth/infancy;<br><br>Lifelong                                     | After birth/infancy;<br><br>Lifelong                                                                                                                          | After birth/infancy;<br><br>Lifelong                                                                        | Variable, any age;<br><br>Spontaneous remission                              |

FACAS = FXII-associated cold autoinflammatory syndrome; CAPS = Cryopyrin-associated periodic syndrome; FCAS = Familial cold autoinflammatory syndrome; MWS = Muckle-Wells syndrome; NOMID = Neonatal-onset multisystem inflammatory disease; PLAID = PLCG2-associated antibody deficiency and immune dysregulation

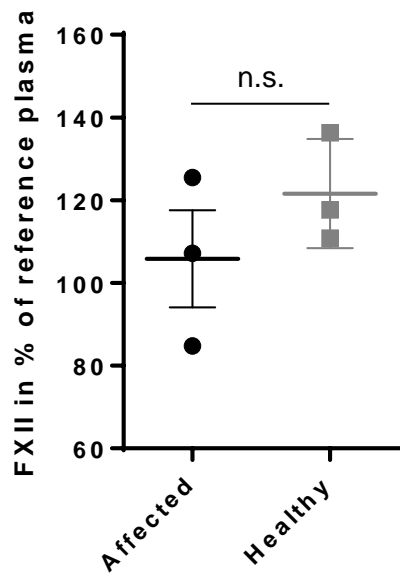

**Supplementary Figure 1: FXII plasma levels in patients are comparable to healthy controls.** FXII plasma levels from FACAS (black bars) and healthy control (grey bars) subjects (n=3 affected vs. n=3 healthy) were assessed by ELISA. Graph shows individual data points and the mean  $\pm$ sem. Statistical significance was assessed by unpaired Student's t-test with Welch's correction. Source data are provided as a source data file.

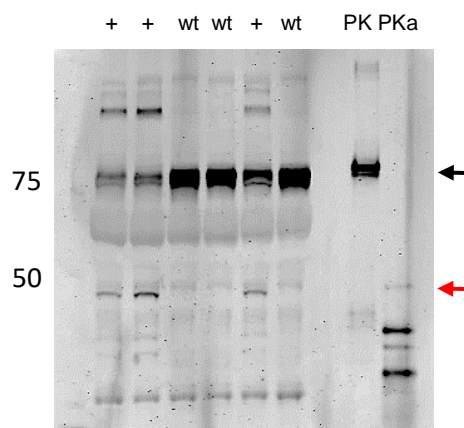

**Supplementary Figure 2:** Citrate plasma of affected (n=3) and healthy family members (n=3) was immunoblotted for prekallikrein (PK) showing substantial cleavage of PK (black arrow) and kallikrein (red arrow) formation when compared with activated recombinant PK, n=2 technical replicates. Source data are provided as a source data file.

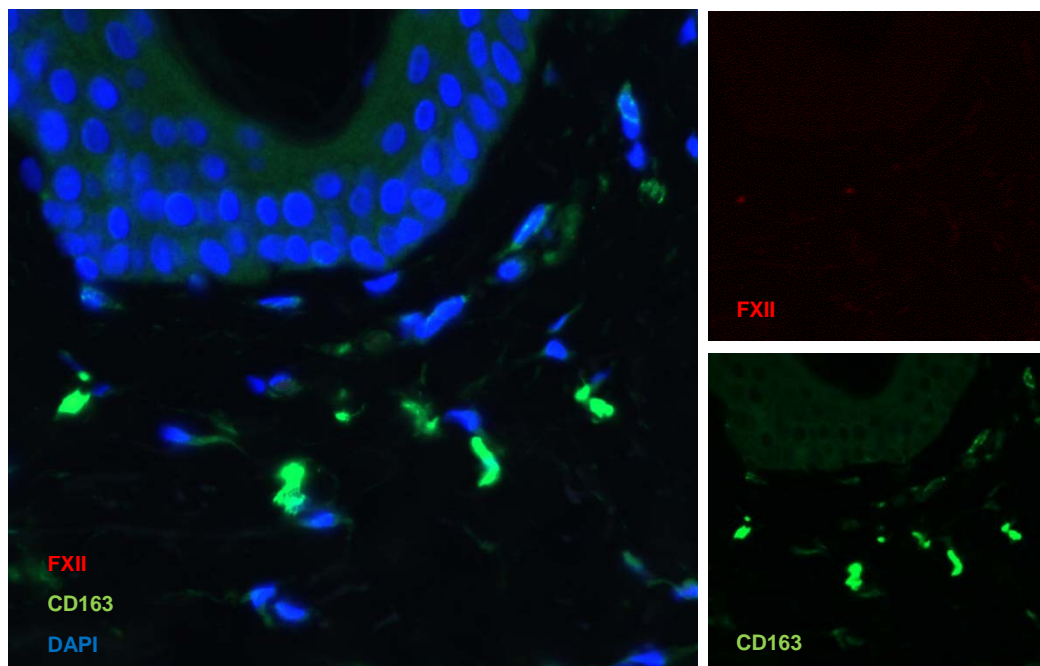

**Supplementary Figure 3: FXII is not expressed by skin macrophages of FACAS patients.**

Lesional skin of a FACAS patient ca. 1h after cold exposure. FXII immunoreactivity does not co-localize with macrophages (green fluorescence). Original magnification 400x, n=2 technical replicates.

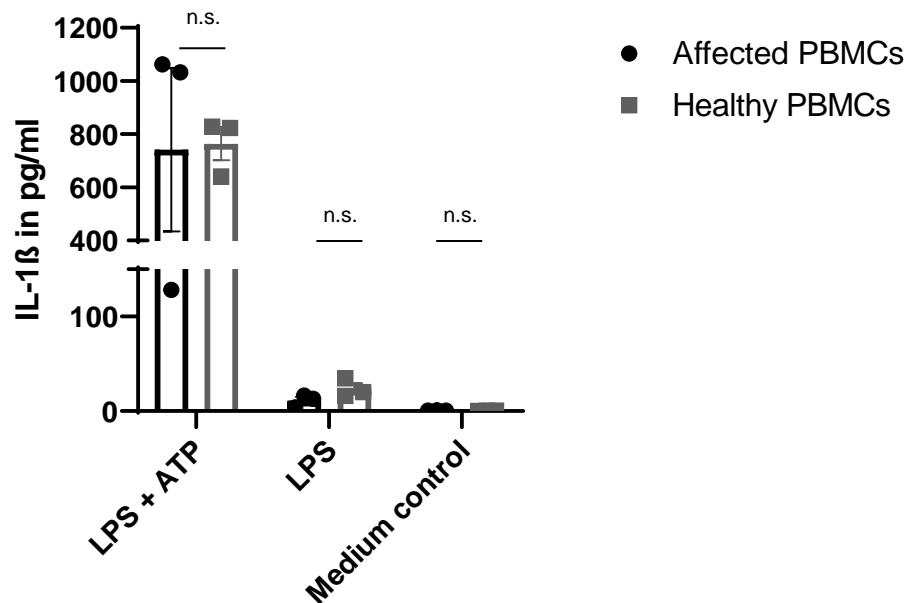

**Supplementary Figure 4: Patient PBMCs show low basal IL-1 $\beta$  secretion that is comparable to healthy controls.** Peripheral blood mononuclear cells were isolated from FACAS (black bars) and healthy control (grey bars) subjects (n=3 affected vs. n=3 healthy) by density gradient centrifugation. Cells were pre-stimulated with LPS and activated by ATP, LPS-stimulated only and left untreated (medium ctrl). Bar graphs show individual data points and the mean  $\pm$ sem. Statistical significance was assessed by unpaired Student's t-test with Welch's correction. Source data are provided as a source data file.
